# Supplementary material for: Abundance and prevalence of ESBL coding genes in patients undergoing first line eradication therapy for Helicobacter pylori
Source: PLoS One. 2023 Aug 10;18(8):e0289879. doi: 10.1371/journal.pone.0289879 (PMC10414638; doi:10.1371/journal.pone.0289879)
Supplement: S1 Table — (XLSX) [file pone.0289879.s002.xlsx]

## Sheet: Sheet1
Cluster name	Plate name	Sequence name	Sequence 5' - 3'
Staphylococcus sp. blaR1 gene for beta-lactam/signal transducer BlaR1	ESBL-pool-1.1	cluster_1_fwd	GCGGAATCTATTATGGACTCCG
Staphylococcus sp. blaR1 gene for beta-lactam/signal transducer BlaR1	ESBL-pool-1.1	cluster_1_rev	TTGCCCCATCAAAAACTGGC
Clostridium botulinum blaR1 gene for BlaR1 family beta-lactam sensor/signal transducer	ESBL-pool-1.1	cluster_2_fwd	AGAGGGAAGCGAGAAGAGAGT
Clostridium botulinum blaR1 gene for BlaR1 family beta-lactam sensor/signal transducer	ESBL-pool-1.1	cluster_2_rev	ACTGGCCATCTAGAGTCCGA
Staphylococcus aureus blaI gene for penicillinase repressor BlaI	ESBL-pool-1.1	cluster_3_fwd	TGGCTGAATGGGATGTTATGA
Staphylococcus aureus blaI gene for penicillinase repressor BlaI	ESBL-pool-1.1	cluster_3_rev	TCATGTCCCCTCCATACAGT
Ralstonia mannitolilytica blaOXA gene for carbapenem-hydrolyzing class D BL	ESBL-pool-1.1	cluster_4_fwd	GCGTGACGATCATGAAGTGC
Ralstonia mannitolilytica blaOXA gene for carbapenem-hydrolyzing class D BL	ESBL-pool-1.1	cluster_4_rev	CTTCAAGCGCCGAGATTTCG
Serratia marcescens blaSRT gene for class C BL	ESBL-pool-1.1	cluster_6_fwd	GATTCGCTATCTGGACGCCA
Serratia marcescens blaSRT gene for class C BL	ESBL-pool-1.1	cluster_6_rev	CACTTGTTGGCCAGCATCAC
Morganella morganii blaDHA gene for class C BL	ESBL-pool-1.1	cluster_8_fwd	ACCCGGCAGTCAAATACCAG
Morganella morganii blaDHA gene for class C BL	ESBL-pool-1.1	cluster_8_rev	CCCGTAAGATTCCGCATCGA
Escherichia coli blaEC gene for class C ESBL	ESBL-pool-1.1	cluster_9_fwd	CAGGGGCGTTAGATGCTGAA
Escherichia coli blaEC gene for class C ESBL	ESBL-pool-1.1	cluster_9_rev	ATAGCTACCAAATCCGCCGG
Enterobacteriaceae blaCMY gene for class C BL	ESBL-pool-1.1	cluster_10_fwd	ATCCCCTGGCCAACTTGATG
Enterobacteriaceae blaCMY gene for class C BL	ESBL-pool-1.1	cluster_10_rev	GGTTTACCTCAACGGCAGGA
Enterobacteriaceae blaMIR gene for cephalosporin-hydrolyzing class C BL	ESBL-pool-1.1	cluster_16_fwd	TGACGACGCGGGTCTTTAAA
Enterobacteriaceae blaMIR gene for cephalosporin-hydrolyzing class C BL	ESBL-pool-1.1	cluster_16_rev	TAAATGCCACGTAGCTGCCA
Enterobacter sp. blaACT gene for cephalosporin-hydrolyzing class C BL	ESBL-pool-1.1	cluster_17_fwd	ATCCCTGCTGCGCTTCTATC
Enterobacter sp. blaACT gene for cephalosporin-hydrolyzing class C BL	ESBL-pool-1.1	cluster_17_rev	CACGTTGGTTTTCACGCCAT
Enterobacter sp. and Pantoea agglomerans blaACT gene for cephalosporin-hydrolyzing class C BL	ESBL-pool-1.1	cluster_18_fwd	CGTTACGCCGCTGATGAAAG
Enterobacter sp. and Pantoea agglomerans blaACT gene for cephalosporin-hydrolyzing class C BL	ESBL-pool-1.1	cluster_18_rev	TGACCTCATCCGGTACCTGT
Ochrobactrum anthropi blaOCH gene for class C ESBL	ESBL-pool-1.1	cluster_20_fwd	ACAAGCCGTTCGACGTTTTG
Ochrobactrum anthropi blaOCH gene for class C ESBL	ESBL-pool-1.1	cluster_20_rev	CCAGCCAAGTCCCTGATTGT
Mycobacterium smegmatis blaE gene for class C BL	ESBL-pool-1.1	cluster_21_fwd	AGTTCACCGACCTGATGCAG
Mycobacterium smegmatis blaE gene for class C BL	ESBL-pool-1.1	cluster_21_rev	AGCCGACTTGAGTGCTCTTC
Pseudomonas aeruginosa blaPDC gene for class C BL/ESBL	ESBL-pool-1.1	cluster_23_fwd	CGATACCAGATTCCCCTGCC
Pseudomonas aeruginosa blaPDC gene for class C BL/ESBL	ESBL-pool-1.1	cluster_23_rev	GTGAAGGTCTTGCTCACCGA
Enterobacteriaceae blaFOX gene for cephalosporin-hydrolyzing class C BL	ESBL-pool-1.1	cluster_24_fwd	TAGTCTGGGCCAGCCATTTG
Enterobacteriaceae blaFOX gene for cephalosporin-hydrolyzing class C BL	ESBL-pool-1.1	cluster_24_rev	GTAACCGGATTGGCCTGGAA
Aeromonas enteropelogenes blaTRU gene for class C BL	ESBL-pool-1.1	cluster_25_fwd	ACCTTTACTGCGACCTTGGG
Aeromonas enteropelogenes blaTRU gene for class C BL	ESBL-pool-1.1	cluster_25_rev	AGTACTGGCGCATTCTCTCG
Aeromonas sp., Klebsiella sp. blaMOX gene for CMY-1/MOX family class C BL	ESBL-pool-1.1	cluster_28_fwd	AAGGGATCCGCCTTTGACAG
Aeromonas sp., Klebsiella sp. blaMOX gene for CMY-1/MOX family class C BL	ESBL-pool-1.1	cluster_28_rev	ACCGAGTAGTGCCCTTTGTG
Pseudomonas aeruginosa blaPAC gene for class C BL PAC-1	ESBL-pool-1.1	cluster_30_fwd	GCCATAACGGAGACCCACAA
Pseudomonas aeruginosa blaPAC gene for class C BL PAC-1	ESBL-pool-1.1	cluster_30_rev	GTACCAGCTCATATGCCGCT
Serratia marcescens blaBES gene for class A ESBL BES-1,	ESBL-pool-1.1	cluster_31_fwd	GCGGCGAGAGTTACAGCTAT
Serratia marcescens blaBES gene for class A ESBL BES-1,	ESBL-pool-1.1	cluster_31_rev	GTAACCCCTTGCCCAGAGTC
Pandoraea sputorum blaOXA gene for carbapenem-hydrolyzing class D BL	ESBL-pool-1.1	cluster_33_fwd	GCTACCCGTGCTATCAGGTC
Pandoraea sputorum blaOXA gene for carbapenem-hydrolyzing class D BL	ESBL-pool-1.1	cluster_33_rev	CGCCGTTCATGTCGATGTTC
Pandoraea pulmonicola blaOXA gene for carbapenem-hydrolyzing class D BL OXA-156	ESBL-pool-1.1	cluster_36_fwd	GACCTATCAGGCGTACGACG
Pandoraea pulmonicola blaOXA gene for carbapenem-hydrolyzing class D BL OXA-156	ESBL-pool-1.1	cluster_36_rev	TCGCTTCCACGATCGAGATG
Aeromonas sobria blaOXA gene for oxacillin-hydrolyzing class D BL	ESBL-pool-1.1	cluster_39_fwd	GGTTCTCCCAGCAGATCACC
Aeromonas sobria blaOXA gene for oxacillin-hydrolyzing class D BL	ESBL-pool-1.1	cluster_39_rev	TGCACCACGGTATGAACGAA
Pseudomonas aeruginosa blaOXA gene for class D ESBL	ESBL-pool-1.1	cluster_41_fwd	CTGCACGCTTGTTATCGACG
Pseudomonas aeruginosa blaOXA gene for class D ESBL	ESBL-pool-1.1	cluster_41_rev	ATCGCCGGAAACATCCTTGT
Pseudomonas aeruginosa blaBEL gene for class A ESBL	ESBL-pool-1.1	cluster_43_fwd	TTCAATCCGCCCTCCAACTC
Pseudomonas aeruginosa blaBEL gene for class A ESBL	ESBL-pool-1.1	cluster_43_rev	ATGAATCAGGCAAGCCAGCT
Enterobacteriaceae blaGES gene for class A BL	ESBL-pool-1.1	cluster_44_fwd	ACACCATTGAGAGGTGGCTG
Enterobacteriaceae blaGES gene for class A BL	ESBL-pool-1.1	cluster_44_rev	CCGTGCTCAGGATGAGTTGT
Pseudovibrio sp. blaPSV gene for penicillin-hydrolyzing class A BL	ESBL-pool-1.1	cluster_45_fwd	TACAAAGCAACCGAGCTCGT
Pseudovibrio sp. blaPSV gene for penicillin-hydrolyzing class A BL	ESBL-pool-1.1	cluster_45_rev	GGCGAAGTAGTATCACGGGG
Escherichia hermannii blaHER gene for class A BL	ESBL-pool-1.1	cluster_46_fwd	GATACCTCTTCGCCGCAGAA
Escherichia hermannii blaHER gene for class A BL	ESBL-pool-1.1	cluster_46_rev	AATCGCGACATAAAACGGCG
Raoultella terrigena blaTER gene for class A BL	ESBL-pool-1.1	cluster_50_fwd	CTTTTTGCCCCGATCCTCCT
Raoultella terrigena blaTER gene for class A BL	ESBL-pool-1.1	cluster_50_rev	CTCGTTAAGCTCGGTCTCCC
Raoultella ornithinolytica and R. Planticola blaPLA gene for class A BL/BSBL	ESBL-pool-1.1	cluster_51_fwd	ATTACCGGCAGCAGGATCTG
Raoultella ornithinolytica and R. Planticola blaPLA gene for class A BL/BSBL	ESBL-pool-1.1	cluster_51_rev	TACCATCCAGCGTTGCAACT
Citrobacter gillenii blaRUB gene for class A BSLB	ESBL-pool-1.1	cluster_52_fwd	CGGCGTGATCTGGTCGAATA
Citrobacter gillenii blaRUB gene for class A BSLB	ESBL-pool-1.1	cluster_52_rev	TGCTGTGATGTCGTCGTCAA
Citrobacter koseri blaCKO gene for MAL/CKO family class A BL	ESBL-pool-1.1	cluster_54_fwd	CTCATCGCCAGGAAGCTCAA
Citrobacter koseri blaCKO gene for MAL/CKO family class A BL	ESBL-pool-1.1	cluster_54_rev	TGCGAGTGTTGAAAACAGCG
Aeromonas hydrophila blaAER gene for carbenicillin-hydrolyzing class A BL	ESBL-pool-1.1	cluster_55_fwd	TCTCTCTGGGCCAATCCGTA
Aeromonas hydrophila blaAER gene for carbenicillin-hydrolyzing class A BL	ESBL-pool-1.1	cluster_55_rev	GATGATGCTGACAACGCGTC
Pseudomonas aeruginosa bla gene for class A beta-lactamase	ESBL-pool-1.1	cluster_56_fwd	TCTCTGTCCCTGTGGCGATA
Pseudomonas aeruginosa bla gene for class A beta-lactamase	ESBL-pool-1.1	cluster_56_rev	AAATTGGCCGCTGTGTTGTC
Erwinia persicina blaERP gene for class A ESBL ERP-1	ESBL-pool-1.1	cluster_57_fwd	AACAAACCCTGCACTGGACA
Erwinia persicina blaERP gene for class A ESBL ERP-1	ESBL-pool-1.1	cluster_57_rev	GCAATGGCGTTTTTCCCTGT
Kluyvera cryocrescens, E.cloacae blaKLUC gene for class A ESBL	ESBL-pool-1.1	cluster_59_fwd	TCGCGATGTGTAGTACCAGC
Kluyvera cryocrescens, E.cloacae blaKLUC gene for class A ESBL	ESBL-pool-1.1	cluster_59_rev	TCATCCAGGTCACCAACTGC
Enterobacteriaceae blaCTX-M gene for class A ESBL	ESBL-pool-1.1	cluster_60_fwd	TGTCACTGGCTGAGCTTAGC
Enterobacteriaceae blaCTX-M gene for class A ESBL	ESBL-pool-1.1	cluster_60_rev	CCTTAGGTTGAGGCTGGGTG
E.cloacae, P.stuartii blaCTX-M gene for class A ESBL	ESBL-pool-1.1	cluster_62_fwd	GCGATAACACCGCGATGAAC
E.cloacae, P.stuartii blaCTX-M gene for class A ESBL	ESBL-pool-1.1	cluster_62_rev	TTGCCCAGGGTCAGGTTTTT
Salmonella enterica blaCTX-M gene for class A ESBL CTX-M-151	ESBL-pool-1.1	cluster_75_fwd	GTTTGATGAGCTAAGCGCCG
Salmonella enterica blaCTX-M gene for class A ESBL CTX-M-151	ESBL-pool-1.1	cluster_75_rev	AACCTGGCCTAAAGCATCCC
Enterobacteriaceae, P.aeruginosa and A.braumanii blaKPC gene for carbapenem-hydrolyzing class A BL	ESBL-pool-1.1	cluster_76_fwd	TGTGTACGCGATGGATACCG
Enterobacteriaceae, P.aeruginosa and A.braumanii blaKPC gene for carbapenem-hydrolyzing class A BL	ESBL-pool-1.1	cluster_76_rev	GGAACGTGGTATCGCCGATA
Chromobacterium haemolyticum blaCRH gene for carbapenem-hydrolyzing class A BL CRH-1	ESBL-pool-1.1	cluster_78_fwd	CAAGCTGGCCAAACTGGAAC
Chromobacterium haemolyticum blaCRH gene for carbapenem-hydrolyzing class A BL CRH-1	ESBL-pool-1.1	cluster_78_rev	GGCCGTTGATTTCCTTGAGC
Nocardia farcinica blaFAR gene for class A ESBL	ESBL-pool-1.1	cluster_85_fwd	GAAGAAATCTGGTCGCCGGA
Nocardia farcinica blaFAR gene for class A ESBL	ESBL-pool-1.1	cluster_85_rev	TCGAAATAGCCGGACGACAG
Streptomyces albus bla gene for Exo family class A BL	ESBL-pool-1.1	cluster_86_fwd	CGAGCTGTTCCCGATGTGTT
Streptomyces albus bla gene for Exo family class A BL	ESBL-pool-1.1	cluster_86_rev	TGATGGAGACCTCGCACAAC
Mycobacterium fortuitum blaF gene for class A BL	ESBL-pool-1.1	cluster_88_fwd	AACGTTCTGATCGGTTCGCT
Mycobacterium fortuitum blaF gene for class A BL	ESBL-pool-1.1	cluster_88_rev	CCCGGTTGTCCAGTGAGATC
Mycobacterium smegmatis blaS gene for class A BL	ESBL-pool-1.1	cluster_89_fwd	GGGAGACCGAACTGAACTCG
Mycobacterium smegmatis blaS gene for class A BL	ESBL-pool-1.1	cluster_89_rev	ACCCACATCGTTGGTGGATC
Sphingobium sp. blaSGM gene for class A BL	ESBL-pool-1.1	cluster_93_fwd	GATCTGCTGGACTATGCCCC
Sphingobium sp. blaSGM gene for class A BL	ESBL-pool-1.1	cluster_93_rev	CCTCCGCATTCTCGTTGAGA
Sphingobium chlorophenolicumblaSGM gene for class A BL SGM-4	ESBL-pool-1.1	cluster_94_fwd	GGCGCGGAAGGCAATAAATT
Sphingobium chlorophenolicumblaSGM gene for class A BL SGM-4	ESBL-pool-1.1	cluster_94_rev	TCCGGCTTCAAATCGGTGAA
Stenotrophomonas maltophilia blaL2 gene for class A BL	ESBL-pool-1.1	cluster_96_fwd	ACGTTCAAGTCGATGCTGGT
Stenotrophomonas maltophilia blaL2 gene for class A BL	ESBL-pool-1.1	cluster_96_rev	GTCTGGTTGTCGATGAGCCA
Desulfovibrio desulfuricans blaDES gene for class A ESBL DES-1	ESBL-pool-1.1	cluster_98_fwd	AAAGCCTGTCTTACCGTGGG
Desulfovibrio desulfuricans blaDES gene for class A ESBL DES-1	ESBL-pool-1.1	cluster_98_rev	CTTTCAGCAGGTTGCCACAC
Salmonella enterica blaPER gene for class A ESBL	ESBL-pool-1.2	cluster_102_fwd	CCGTGGTAGCAAATGAAGCG
Salmonella enterica blaPER gene for class A ESBL	ESBL-pool-1.2	cluster_102_rev	TAGTCGCCGCAGTTTTTCCT
Aeromonas allosaccharophila blaPER gene for class A ESBL	ESBL-pool-1.2	cluster_103_fwd	ATTCGGTGTCGCACAGTGAT
Aeromonas allosaccharophila blaPER gene for class A ESBL	ESBL-pool-1.2	cluster_103_rev	GACGTACCGGTTTTATGCGC
uncultured bacterium BLR5 bla gene for class A BL LRA-5	ESBL-pool-1.2	cluster_105_fwd	CGACAGGAAAGTCCGTGTCA
uncultured bacterium BLR5 bla gene for class A BL LRA-5	ESBL-pool-1.2	cluster_105_rev	TCGCCTTTTTGCAGCTGAAC
uncultured bacterium bla gene for class A BL, subclass A2	ESBL-pool-1.2	cluster_106_fwd	ACCAGATACCTCAGCGACCT
uncultured bacterium bla gene for class A BL, subclass A2	ESBL-pool-1.2	cluster_106_rev	TTGCTCCAGATGTTCCGGTC
uncultured bacterium bla gene for class A BL	ESBL-pool-1.2	cluster_107_fwd	GCGTGGCGATTCTGGATTTC
uncultured bacterium bla gene for class A BL	ESBL-pool-1.2	cluster_107_rev	GCTCATGCCCACTGACTTCT
uncultured bacterium blaLRA gene for subclass B3 metallo-BL LRA-9	ESBL-pool-1.2	cluster_110_fwd	ACCGGGATCATGGGTTCCTA
uncultured bacterium blaLRA gene for subclass B3 metallo-BL LRA-9	ESBL-pool-1.2	cluster_110_rev	CGACATTGCCGAGCTTGATG
Bradyrhizobium diazoefficiens blaBJP gene for subclass B3 metallo-BL	ESBL-pool-1.2	cluster_111_fwd	AAGCTCATCCTCAACACGCA
Bradyrhizobium diazoefficiens blaBJP gene for subclass B3 metallo-BL	ESBL-pool-1.2	cluster_111_rev	TGCCATAGACTTCCGGATGC
uncultured bacterium blaLRA gene for subclass B3 metallo-BL LRA-2	ESBL-pool-1.2	cluster_112_fwd	CAAGCCGTTTCGCATCTACG
uncultured bacterium blaLRA gene for subclass B3 metallo-BL LRA-2	ESBL-pool-1.2	cluster_112_rev	CAATGCATAGACCTGCGCAC
Massilia sp. blaMSI gene for subclass B3 metallo-BL	ESBL-pool-1.2	cluster_115_fwd	CACGTCGAATCAGGGTCACA
Massilia sp. blaMSI gene for subclass B3 metallo-BL	ESBL-pool-1.2	cluster_115_rev	GTATTGCGGATCGTTGCGAC
uncultured bacterium blaRm3 gene for subclass B3 metallo-BL Rm3	ESBL-pool-1.2	cluster_117_fwd	CATGCGCTGCCCAAATATCC
uncultured bacterium blaRm3 gene for subclass B3 metallo-BL Rm3	ESBL-pool-1.2	cluster_117_rev	CTGGCGCTGAACTTGAAACC
Janthinobacterium lividum blaTHIN-B gene for subclass B3 metallo-BL THIN-B	ESBL-pool-1.2	cluster_118_fwd	CCGGATACCCCTGTCGATTG
Janthinobacterium lividum blaTHIN-B gene for subclass B3 metallo-BL THIN-B	ESBL-pool-1.2	cluster_118_rev	CCACCTTGACCTTCTCCACC
Sphingomonas sp. blaSPG gene for subclass B3 metallo-BL	ESBL-pool-1.2	cluster_119_fwd	TTTCGGCCTATCTGATCGCC
Sphingomonas sp. blaSPG gene for subclass B3 metallo-BL	ESBL-pool-1.2	cluster_119_rev	CTCGTCGCGCCTTTTGTATG
Caulobacter vibrioides blaCAU gene for subclass B3 metallo-BL	ESBL-pool-1.2	cluster_120_fwd	CGTGTGGTCGGCAACATCTA
Caulobacter vibrioides blaCAU gene for subclass B3 metallo-BL	ESBL-pool-1.2	cluster_120_rev	TGGGCCATAGATATTGTCGCC
Stenotrophomonas maltophilia blaL1 gene for subclass B3 metallo-BL,	ESBL-pool-1.2	cluster_121_fwd	GACTGCCACACTTGCCTTTG
Stenotrophomonas maltophilia blaL1 gene for subclass B3 metallo-BL,	ESBL-pool-1.2	cluster_121_rev	CTGAGCAGGATCAGCCGTAG
Stenotrophomonas maltophilia blaL1 gene for L1 family subclass B3 metallo-beta-lactamase,	ESBL-pool-1.2	cluster_123_fwd	CCTATACCGTGGATGCGTCC
Stenotrophomonas maltophilia blaL1 gene for L1 family subclass B3 metallo-beta-lactamase,	ESBL-pool-1.2	cluster_123_rev	AGCAGGATCAATCGCAGGTC
Stenotrophomonas maltophilia blaL1 gene for subclass B3 metallo-BL	ESBL-pool-1.2	cluster_124_fwd	AGACCGCATCGTCATGGATG
Stenotrophomonas maltophilia blaL1 gene for subclass B3 metallo-BL	ESBL-pool-1.2	cluster_124_rev	GTCGCTAAGCTGTGCCTGTA
Pseudomonas otitidis blaPOM gene for subclass B3 metallo-BL	ESBL-pool-1.2	cluster_126_fwd	ACCTCAAGCTGATCCTGCAC
Pseudomonas otitidis blaPOM gene for subclass B3 metallo-BL	ESBL-pool-1.2	cluster_126_rev	CTCAGGCTGTCGCTATAGGC
Serratia proteamaculans blaSPR gene for putative metallo-BL SPR-1	ESBL-pool-1.2	cluster_128_fwd	TGGCGGCAAACAGGATTTTG
Serratia proteamaculans blaSPR gene for putative metallo-BL SPR-1	ESBL-pool-1.2	cluster_128_rev	CGAAGCGCGTTCCCTTATTG
Enterobacteriaceae blaNDM gene for subclass B1 metallo-BL	ESBL-pool-1.2	cluster_129_fwd	CAGTCGCTTCCAACGGTTTG
Enterobacteriaceae blaNDM gene for subclass B1 metallo-BL	ESBL-pool-1.2	cluster_129_rev	TGCTGTCCTTGATCAGGCAG
Achromobacter sp. blaOXA gene for class D BL	ESBL-pool-1.2	cluster_131_fwd	GTGGTCTGGTATTCGCAGCT
Achromobacter sp. blaOXA gene for class D BL	ESBL-pool-1.2	cluster_131_rev	GTTCTCGGCCAGGTCGTAG
Ralstonia pickettii blaOXA gene for oxacillin-hydrolyzing class D BL	ESBL-pool-1.2	cluster_135_fwd	GACCACGGCTTCCTCAAAGA
Ralstonia pickettii blaOXA gene for oxacillin-hydrolyzing class D BL	ESBL-pool-1.2	cluster_135_rev	ATCCATGTTGCCGTAGCCAA
Acidaminococcus fermentans blaACI gene for class A ESBL	ESBL-pool-1.2	cluster_137_fwd	ACGCCGTTGACATGGAGAAT
Acidaminococcus fermentans blaACI gene for class A ESBL	ESBL-pool-1.2	cluster_137_rev	AACAAATTTCCGCCAGCGTC
Serratia fonticola blaSFH gene for subclass B2 metallo-BL	ESBL-pool-1.2	cluster_138_fwd	TCGAGCTGGTGGAAATGCTT
Serratia fonticola blaSFH gene for subclass B2 metallo-BL	ESBL-pool-1.2	cluster_138_rev	TCCCATACAAAACGCGCTCT
Achromobacter sp., A.pitii blaTMB gene for subclass B1 metallo-BL	ESBL-pool-1.2	cluster_141_fwd	GGTAAGGAGCAGGCAAGGAG
Achromobacter sp., A.pitii blaTMB gene for subclass B1 metallo-BL	ESBL-pool-1.2	cluster_141_rev	TTTTCCATGACCAGGCACCA
Pseudomonas stutzeri blaDIM gene for subclass B1 metallo-BL	ESBL-pool-1.2	cluster_142_fwd	GGCATGAGGATAGAACCGCA
Pseudomonas stutzeri blaDIM gene for subclass B1 metallo-BL	ESBL-pool-1.2	cluster_142_rev	TGTAGCCTAACCCCTCGGAA
Pseudomonas aeruginosa blaFIM gene for subclass B1 metallo-BL	ESBL-pool-1.2	cluster_143_fwd	GTCGTGAACTCTGGCGTACA
Pseudomonas aeruginosa blaFIM gene for subclass B1 metallo-BL	ESBL-pool-1.2	cluster_143_rev	TAGGTCACAATGCCCTGCTG
Acinetobacter sp. blaADC gene for cephalosporin-hydrolyzing class C BL	ESBL-pool-1.2	cluster_149_fwd	ATGCAACGCTGACGGGATAT
Acinetobacter sp. blaADC gene for cephalosporin-hydrolyzing class C BL	ESBL-pool-1.2	cluster_149_rev	TCGAATACGTCTTGGAGCCG
Empedobacter brevis blaEBR gene for subclass B1 metallo-BL	ESBL-pool-1.2	cluster_153_fwd	GCCAGTTATCGCTGTCTTTGC
Empedobacter brevis blaEBR gene for subclass B1 metallo-BL	ESBL-pool-1.2	cluster_153_rev	TCGGAAACCACACCACAACA
Flavobacterium johnsoniae blaJOHN gene for subclass B1 metallo-BL	ESBL-pool-1.2	cluster_154_fwd	CGTTGTGCTTTTTGATGCGC
Flavobacterium johnsoniae blaJOHN gene for subclass B1 metallo-BL	ESBL-pool-1.2	cluster_154_rev	AGCATGTCCTTTTCCTGGGT
Enterobacteriaceae, P.aeruginosa, A.braumanii, P.mirabilis, V.parahaemolyticus blaVEB gene for class A ESBL	ESBL-pool-1.2	cluster_155_fwd	CCCCTCAAGACCTTTTGCCT
Enterobacteriaceae, P.aeruginosa, A.braumanii, P.mirabilis, V.parahaemolyticus blaVEB gene for class A ESBL	ESBL-pool-1.2	cluster_155_rev	TAGTGGCTGCTGCAATTCCA
Chryseobacterium sp. blaCPS gene for subclass B3 metallo-BL	ESBL-pool-1.2	cluster_156_fwd	ACACAGGTTTGGCGGATTCT
Chryseobacterium sp. blaCPS gene for subclass B3 metallo-BL	ESBL-pool-1.2	cluster_156_rev	AGGTTCGAAAGTAACGCCGT
Pedobacter sp. blaB3PEDO gene for subclass B3 metallo-BL	ESBL-pool-1.2	cluster_161_fwd	AGATGCGGACGCTCTTGAAA
Pedobacter sp. blaB3PEDO gene for subclass B3 metallo-BL	ESBL-pool-1.2	cluster_161_rev	TGCATGAGAGGCAACCCAAA
Pedobacter sp. blaB3PEDO gene for subclass B3 metallo-BL PEDO-1	ESBL-pool-1.2	cluster_162_fwd	TTGCCTCTTGCTTTTTCCGC
Pedobacter sp. blaB3PEDO gene for subclass B3 metallo-BL PEDO-1	ESBL-pool-1.2	cluster_162_rev	CCTGTGTGGTCAGCAGGATT
Acinetobacter sp. blaADC gene for class C BL	ESBL-pool-1.2	cluster_166_fwd	CCAGTGGTAACCTTGCCCTT
Acinetobacter sp. blaADC gene for class C BL	ESBL-pool-1.2	cluster_166_rev	TGGGTTCAGGTTGGCATGAA
Acinetobacter sp. and O.urethralis blaADC gene for class C ESBL/BL	ESBL-pool-1.2	cluster_168_fwd	TCCAGCGCCTTTACAAACTT
Acinetobacter sp. and O.urethralis blaADC gene for class C ESBL/BL	ESBL-pool-1.2	cluster_168_rev	CGCTGCCTTAATGCGTTCTT
Moraxella catarrhalis blaBRO gene for class A BL	ESBL-pool-1.2	cluster_171_fwd	TGGGGGTTTGACTGCATTCA
Moraxella catarrhalis blaBRO gene for class A BL	ESBL-pool-1.2	cluster_171_rev	GTGCCTGTTTTGTCGCCAAT
E.coli, S.marcescens blaTLA gene for class A ESBL	ESBL-pool-1.2	cluster_172_fwd	ACCAATTGGACAACTCCCGA
E.coli, S.marcescens blaTLA gene for class A ESBL	ESBL-pool-1.2	cluster_172_rev	CGCTCTTTTCGCTTGAATCCG
Francisella philomiragia blaFPH gene for carbapenem-hydrolyzing class A BL	ESBL-pool-1.2	cluster_174_fwd	ATTGGGGGCTTGGAAAAGCT
Francisella philomiragia blaFPH gene for carbapenem-hydrolyzing class A BL	ESBL-pool-1.2	cluster_174_rev	GCCGCATACTCTCCACAAGT
Pseudomonas aeruginosa blaLCR gene for oxacillin-hydrolyzing class D BL	ESBL-pool-1.2	cluster_178_fwd	GCGAGCAGCTATGATTCCCT
Pseudomonas aeruginosa blaLCR gene for oxacillin-hydrolyzing class D BL	ESBL-pool-1.2	cluster_178_rev	AAACGCACCTATCGCCTTCA
Citrobacter freundii blaOXA gene for carbapenem-hydrolyzing class D BL	ESBL-pool-1.2	cluster_179_fwd	TGCTCTCGCTGAGGACAAAG
Citrobacter freundii blaOXA gene for carbapenem-hydrolyzing class D BL	ESBL-pool-1.2	cluster_179_rev	TACCCGACAAACTCACCACG
Pseudomonas aeruginosa blaOXA gene for class D BL OXA-198	ESBL-pool-1.2	cluster_180_fwd	TCGTCGCTACACAACGGAAA
Pseudomonas aeruginosa blaOXA gene for class D BL OXA-198	ESBL-pool-1.2	cluster_180_rev	GGCTCGCGTAATTCTCCGTA
Acinetobacter sp. blaOXA gene for carbapenem-hydrolyzing class D BL	ESBL-pool-1.2	cluster_184_fwd	TGCAGCCTGGGAAAAAGACA
Acinetobacter sp. blaOXA gene for carbapenem-hydrolyzing class D BL	ESBL-pool-1.2	cluster_184_rev	CCAAGGCCTGCTGCAAAATT
Acinetobacter sp. blaOXA gene for class D BL OXA-297/8	ESBL-pool-1.2	cluster_187_fwd	AATGGGATGGACAGAAGCGG
Acinetobacter sp. blaOXA gene for class D BL OXA-297/8	ESBL-pool-1.2	cluster_187_rev	TCTACCCAACCTGTCCACCA
Acinetobacter sp. blaOXA gene for OXA-286 family class D BL	ESBL-pool-1.2	cluster_190_fwd	AATGGGATGGCCAAAAACGC
Acinetobacter sp. blaOXA gene for OXA-286 family class D BL	ESBL-pool-1.2	cluster_190_rev	TGCCGTGACTTTGCCATTTG
Acinetobacter parvus blaOXA gene for class D BL OXA-279	ESBL-pool-1.2	cluster_195_fwd	CTCAAAGCGCCGTGTCAAAA
Acinetobacter parvus blaOXA gene for class D BL OXA-279	ESBL-pool-1.2	cluster_195_rev	TTTTCCCAGCTCGCAAAAGC
Acinetobacter sp., K.pneumoniae blaOXA gene for carbapenem-hydrolyzing class D BL	ESBL-pool-1.2	cluster_198_fwd	GCTTTCTGCAGTCCCAGTCT
Acinetobacter sp., K.pneumoniae blaOXA gene for carbapenem-hydrolyzing class D BL	ESBL-pool-1.2	cluster_198_rev	CGGCATTTCTGACCGCATTT
Acinetobacter sp. blaOXA gene for carbapenem-hydrolyzing class D BL OXA	ESBL-pool-1.2	cluster_200_fwd	TGGCACTTTCAGCAGTTCCT
Acinetobacter sp. blaOXA gene for carbapenem-hydrolyzing class D BL OXA	ESBL-pool-1.2	cluster_200_rev	ACCCAACCTGTTAACCAACCT
Acinetobacter sp. blaOXA gene for OXA-213 family carbapenem-hydrolyzing class D BL	ESBL-pool-1.2	cluster_201_fwd	ATGTTCCCGCCTCTACCTTT
Acinetobacter sp. blaOXA gene for OXA-213 family carbapenem-hydrolyzing class D BL	ESBL-pool-1.2	cluster_201_rev	CAACATCCCATCCCCAACCA
Acinetobacter calcoaceticus blaOXA gene for carbapenem-hydrolyzing class D BL	ESBL-pool-1.3	cluster_203_fwd	ACTGTTTGATCAGGCGCAGA
Acinetobacter calcoaceticus blaOXA gene for carbapenem-hydrolyzing class D BL	ESBL-pool-1.3	cluster_203_rev	TGTCCGCATTACCGAAACCA
Acinetobacter bouvetii blaOXA gene for class D BL	ESBL-pool-1.3	cluster_208_fwd	TTTAACCTTAGCGCAGGCCA
Acinetobacter bouvetii blaOXA gene for class D BL	ESBL-pool-1.3	cluster_208_rev	GGCTGTGGTTTTGCCTTGAG
Acinetobacter gerneri blaOXA gene for class D BL	ESBL-pool-1.3	cluster_213_fwd	ACTGCCTACGTTCCTGCTTC
Acinetobacter gerneri blaOXA gene for class D BL	ESBL-pool-1.3	cluster_213_rev	GGATTGCCCTCGACTTTCCA
uncultured bacterium blaOXA gene for class D BL	ESBL-pool-1.3	cluster_215_fwd	TGGAATGGCGAGCAGAGAAA
uncultured bacterium blaOXA gene for class D BL	ESBL-pool-1.3	cluster_215_rev	TCAACATTCAATCCGTCTGTCG
Campylobacter jejuni/coli blaOXA gene for class D BL	ESBL-pool-1.3	cluster_217_fwd	ACTTTCTCTCCCGCTTCCAC
Campylobacter jejuni/coli blaOXA gene for class D BL	ESBL-pool-1.3	cluster_217_rev	ACCAATTCTTCTTGCCACTTCT
Campylobacter jejuni blaOXA gene for class D BL	ESBL-pool-1.3	cluster_219_fwd	AGACTACAATACAAGCGGAGTT
Campylobacter jejuni blaOXA gene for class D BL	ESBL-pool-1.3	cluster_219_rev	CAGGCACTTGAGAGCGTTTT
Fusobacterium sp. blaOXA gene for oxacillin-hydrolyzing class D BL	ESBL-pool-1.3	cluster_223_fwd	AGCTTGCAAGAGAATTGGGA
Fusobacterium sp. blaOXA gene for oxacillin-hydrolyzing class D BL	ESBL-pool-1.3	cluster_223_rev	AGCCCACCCAGTTTTTCCAT
P.aeruginosa, A.baumannii blaOXA gene for oxacillin-hydrolyzing class D BL	ESBL-pool-1.3	cluster_224_fwd	GATCGGCAATGCGCAATTCT
P.aeruginosa, A.baumannii blaOXA gene for oxacillin-hydrolyzing class D BL	ESBL-pool-1.3	cluster_224_rev	CCATTTGACCATCCCAGCCT
Pseudomonas aeruginosa and Burkholderia cepacia blaOXA gene for oxacillin-hydrolyzing class D BL	ESBL-pool-1.3	cluster_225_fwd	GCGATCAGCGATGCGAAATT
Pseudomonas aeruginosa and Burkholderia cepacia blaOXA gene for oxacillin-hydrolyzing class D BL	ESBL-pool-1.3	cluster_225_rev	CCCGGCTTCCGTAATCATGA
Moraxellaceae, Pseudomonadaceae, Xanthomonadaceae, Enterobacteriaceae blaOXA gene for oxacillin-hydrolyzing class D BL	ESBL-pool-1.3	cluster_226_fwd	CGCCTGCATCGACATTCAAG
Moraxellaceae, Pseudomonadaceae, Xanthomonadaceae, Enterobacteriaceae blaOXA gene for oxacillin-hydrolyzing class D BL	ESBL-pool-1.3	cluster_226_rev	TGACCAAGCGCTGATGTTCT
Salmonella enterica blaOXA gene for class D ESBL	ESBL-pool-1.3	cluster_227_fwd	GCAAGGCTCGACGCTATTTG
Salmonella enterica blaOXA gene for class D ESBL	ESBL-pool-1.3	cluster_227_rev	AGGCAAAGAATACGGGACCG
Bacillus atrophaeus blaBAT gene for class D BL	ESBL-pool-1.3	cluster_228_fwd	CGCAAGATGCCAGCAGTTTT
Bacillus atrophaeus blaBAT gene for class D BL	ESBL-pool-1.3	cluster_228_rev	CAGACCCAAGCGTGTGATCT
S.baltica and S.hafniensis blaOXA gene for class D BL	ESBL-pool-1.3	cluster_233_fwd	ACAGCGGTGAAGAAGGAGTG
S.baltica and S.hafniensis blaOXA gene for class D BL	ESBL-pool-1.3	cluster_233_rev	ATTCGCGCCTCACCAATTTG
K.pneumoniae, E.coli, S.xiamenesis, E.cloacae, S.marcescens bla OXA gene for carbapenem-hydrolyzing class D BL	ESBL-pool-1.3	cluster_234_fwd	AATTGGCGAGGCACGTATGA
K.pneumoniae, E.coli, S.xiamenesis, E.cloacae, S.marcescens bla OXA gene for carbapenem-hydrolyzing class D BL	ESBL-pool-1.3	cluster_234_rev	AAACCATCCGATGTGGGCAT
Citrobacter freundii blaOXA gene for class D BL OXA-436	ESBL-pool-1.3	cluster_236_fwd	GGTTGTGCTCTGGAACGAGA
Citrobacter freundii blaOXA gene for class D BL OXA-436	ESBL-pool-1.3	cluster_236_rev	GCCGAAATGCGAATACCACC
V.cholerae, P.mirabilis, S.enterica,P.aeruginosa blaPSE gene for carbenicillin-hydrolyzing class A BL	ESBL-pool-1.3	cluster_238_fwd	CTAAGTGCTGTAGGTGGCCC
V.cholerae, P.mirabilis, S.enterica,P.aeruginosa blaPSE gene for carbenicillin-hydrolyzing class A BL	ESBL-pool-1.3	cluster_238_rev	CAGCGCGACTGTGATGTATA
Pseudomonas aeruginosa blaPSE gene for carbenicillin-hydrolyzing class A BL	ESBL-pool-1.3	cluster_239_fwd	CGCTCGATGATGCGTGTTTT
Pseudomonas aeruginosa blaPSE gene for carbenicillin-hydrolyzing class A BL	ESBL-pool-1.3	cluster_239_rev	TGAAGCCTCTGTTTGCGCTA
Vibrio parahaemolyticus blaCARB gene for carbenicillin-hydrolyzing class A BL	ESBL-pool-1.3	cluster_241_fwd	CGTTGGGATTATCGCGGAGA
Vibrio parahaemolyticus blaCARB gene for carbenicillin-hydrolyzing class A BL	ESBL-pool-1.3	cluster_241_rev	GTCAAGTCGCGTTGCTTTGT
Vibrio parahaemolyticus blaCARB gene for carbenicillin-hydrolyzing class A BL CARB-42	ESBL-pool-1.3	cluster_242_fwd	GCGTCCCAACTGAATGAGGA
Vibrio parahaemolyticus blaCARB gene for carbenicillin-hydrolyzing class A BL CARB-42	ESBL-pool-1.3	cluster_242_rev	TGTCTAGGCGCGTTGCTTTA
Acinetobacter baumannii blaSCO gene for class A BL	ESBL-pool-1.3	cluster_243_fwd	TGAACCGGACCTCAACGAAG
Acinetobacter baumannii blaSCO gene for class A BL	ESBL-pool-1.3	cluster_243_rev	TCCAGAACTTCGGCAGCAAT
uncultured bacterium blaM gene for class A BL	ESBL-pool-1.3	cluster_244_fwd	GGAGTCCTATCGTTCGCCTG
uncultured bacterium blaM gene for class A BL	ESBL-pool-1.3	cluster_244_rev	TTTTTCTGCAGCGCTCCAAC
Staphylococcus arlettae blaARL gene for class A beta-lactamase	ESBL-pool-1.3	cluster_245_fwd	TCAACACCTCGTGCTACTGC
Staphylococcus arlettae blaARL gene for class A beta-lactamase	ESBL-pool-1.3	cluster_245_rev	GACGGCAACATCATTACGCG
O.urethralis, A.baumannii, P.maritimus, A.calcoaceticus blaRTG gene for carbenicillin-hydrolyzing class A BL	ESBL-pool-1.3	cluster_247_fwd	ACGGGAAAACGTTGGGAACA
O.urethralis, A.baumannii, P.maritimus, A.calcoaceticus blaRTG gene for carbenicillin-hydrolyzing class A BL	ESBL-pool-1.3	cluster_247_rev	TCAAGGCGCGTAGTATCGTC
Serratia marcescens blaSME gene for carbapenem-hydrolyzing class A BL	ESBL-pool-1.3	cluster_250_fwd	ATAGCGACAATGGGGCAACA
Serratia marcescens blaSME gene for carbapenem-hydrolyzing class A BL	ESBL-pool-1.3	cluster_250_rev	CAGCAGGAACACTAGCACGA
Haemophilus influenzae blaROB gene for cephalosporin-hydrolyzing class A BL	ESBL-pool-1.3	cluster_257_fwd	CAAAGAATTGGGTGGCGTGG
Haemophilus influenzae blaROB gene for cephalosporin-hydrolyzing class A BL	ESBL-pool-1.3	cluster_257_rev	AGCGCGAATCAATGGATTGC
Yersinia enterocolitica blaA gene for class A BL	ESBL-pool-1.3	cluster_258_fwd	AGAGTTGGGTGGTTTAGCGG
Yersinia enterocolitica blaA gene for class A BL	ESBL-pool-1.3	cluster_258_rev	TCGGCCAAAGTACCGCAATA
Shewanella frigidimarina blaSHW gene for subclass B1 metallo-BL	ESBL-pool-1.3	cluster_260_fwd	TGGCTTAGTGGTGGTGCAAA
Shewanella frigidimarina blaSHW gene for subclass B1 metallo-BL	ESBL-pool-1.3	cluster_260_rev	TGTTGGCGGTTAATAGGCGT
Shewanella frigidimarina blaSHW gene for subclass B1 metallo-BL	ESBL-pool-1.3	cluster_261_fwd	ATCCCCGTCGCCAGTATTTC
Shewanella frigidimarina blaSHW gene for subclass B1 metallo-BL	ESBL-pool-1.3	cluster_261_rev	TCCGCTTCACCTGTGTAACC
Pseudomonas aeruginosa blaHMB gene for subclass B1 metallo-BL	ESBL-pool-1.3	cluster_263_fwd	CGAAGCTTTTTATCCGGGCG
Pseudomonas aeruginosa blaHMB gene for subclass B1 metallo-BL	ESBL-pool-1.3	cluster_263_rev	GATGCATCGCCCATTGTTCC
Pseudomonas sp., A.baumannii blaIMP gene for subclass B1 metallo-BL	ESBL-pool-1.3	cluster_269_fwd	TGTGGAGCGCGGCTATAAAA
Pseudomonas sp., A.baumannii blaIMP gene for subclass B1 metallo-BL	ESBL-pool-1.3	cluster_269_rev	TTCAAGAGCGACGCATCTCC
Bacillus sp. bla2 gene for subclass B1 metallo-BL	ESBL-pool-1.3	cluster_277_fwd	ACTGCGGAACTAGCAAAGAA
Bacillus sp. bla2 gene for subclass B1 metallo-BL	ESBL-pool-1.3	cluster_277_rev	TCCCCTACTTCTCCATGACCA
Chryseobacterium indologenes blaIND gene for subclass B1 metallo-BL IND-14/3	ESBL-pool-1.3	cluster_286_fwd	GTGCCGGAGATCTGAGCTTT
Chryseobacterium indologenes blaIND gene for subclass B1 metallo-BL IND-14/3	ESBL-pool-1.3	cluster_286_rev	TCCAAGATCGGTTGCAGCTT
Chryseobacterium indologenes blaIND gene for subclass B1 metallo-BL IND-5	ESBL-pool-1.3	cluster_288_fwd	AACAGGAAAGCCTTACCGCA
Chryseobacterium indologenes blaIND gene for subclass B1 metallo-BL IND-5	ESBL-pool-1.3	cluster_288_rev	CTCAACATGTCCTCCGCCTT
Chryseobacterium indologenes blaIND gene for subclass B1 metallo-BL IND-9	ESBL-pool-1.3	cluster_289_fwd	TCTGCCAACGCTGTTTACCT
Chryseobacterium indologenes blaIND gene for subclass B1 metallo-BL IND-9	ESBL-pool-1.3	cluster_289_rev	TAAGCAGCCGCCATCAAGAA
Chryseobacterium indologenes blaIND gene for subclass B1 metallo-BL	ESBL-pool-1.3	cluster_292_fwd	AAAGGCATCCCGACCTATGC
Chryseobacterium indologenes blaIND gene for subclass B1 metallo-BL	ESBL-pool-1.3	cluster_292_rev	TGCCGGCCATTGTTCTACAT
16S rRNA V3	ESBL-pool-1.3	Probio_Uni-F	CCTACGGGRSGCAGCAG
16S rRNA V4	ESBL-pool-1.3	Probio_Uni-R	ATTACCGCGGCTGCT
Enterobacteriaceae, P.mirabilis, M.morganii, S.enterica blaDHA gene for class C BL	ESBL-pool-2.1	cluster_7_fwd	GCAAAGCCAGTATGCGTACG
Enterobacteriaceae, P.mirabilis, M.morganii, S.enterica blaDHA gene for class C BL	ESBL-pool-2.1	cluster_7_rev	TACGGCTGAACCTGGTTGTC
Enterobacteriaceae blaCMH gene for class C BL	ESBL-pool-2.1	cluster_12_fwd	AAAGAGATTTCGCTGGCCGA
Enterobacteriaceae blaCMH gene for class C BL	ESBL-pool-2.1	cluster_12_rev	GAAACGTGGACCGCTTTTCC
Pseudomonas aeruginosa blaPDC gene for class C BL	ESBL-pool-2.1	cluster_22_fwd	CGAGACCCTGTTCGAGATCG
Pseudomonas aeruginosa blaPDC gene for class C BL	ESBL-pool-2.1	cluster_22_rev	ATAAAGGTGTGCTCCAGGCC
Citrobacter freundii blaMOX gene for CMY-1/MOX family class C BL MOX-9	ESBL-pool-2.1	cluster_29_fwd	TATCTCAAGGTCCCTGCCGA
Citrobacter freundii blaMOX gene for CMY-1/MOX family class C BL MOX-9	ESBL-pool-2.1	cluster_29_rev	GGAGCCGGTCTTGTTGAAGA
Pseudomonas aeruginosa blaOXA gene for oxacillin-hydrolyzing class D BL	ESBL-pool-2.1	cluster_32_fwd	TATCCACAGGGGCGGTTAGA
Pseudomonas aeruginosa blaOXA gene for oxacillin-hydrolyzing class D BL	ESBL-pool-2.1	cluster_32_rev	AGTTATCCACAACCTGGCCG
Pandoraea pnomenusa blaOXA gene for carbapenem-hydrolyzing class D BL	ESBL-pool-2.1	cluster_34_fwd	CTGAACGAGGTCGGGTATGG
Pandoraea pnomenusa blaOXA gene for carbapenem-hydrolyzing class D BL	ESBL-pool-2.1	cluster_34_rev	CAGCTTCAGGTCCTTCAGCA
Pandoraea sp. blaOXA gene for carbapenem-hydrolyzing class D BL	ESBL-pool-2.1	cluster_35_fwd	CCGACTGGGGCAAGTACTTT
Pandoraea sp. blaOXA gene for carbapenem-hydrolyzing class D BL	ESBL-pool-2.1	cluster_35_rev	CTGTCGTCGATCCAGTAGGC
Pandoraea apista blaOXA gene for carbapenem-hydrolyzing class D BL OXA-153	ESBL-pool-2.1	cluster_37_fwd	GTCGTGTCTCCCATGGTGTT
Pandoraea apista blaOXA gene for carbapenem-hydrolyzing class D BL OXA-153	ESBL-pool-2.1	cluster_37_rev	TCTCGCGTTCGTTATCGAGG
Aeromonas caviae blaOXA gene for class D BL OXA-504	ESBL-pool-2.1	cluster_40_fwd	GCAGCTGGATGCAATTCTCG
Aeromonas caviae blaOXA gene for class D BL OXA-504	ESBL-pool-2.1	cluster_40_rev	ATCCAGCAGCTTGGGGTAAC
Pseudomonas aeruginosa blaOXA gene for oxacillin-hydrolyzing class D ESBL OXA-45	ESBL-pool-2.1	cluster_42_fwd	GCAGAAAACCACCGACCCTA
Pseudomonas aeruginosa blaOXA gene for oxacillin-hydrolyzing class D ESBL OXA-45	ESBL-pool-2.1	cluster_42_rev	CTTTCGAAGCCGGCAGTTTC
Klebsiella sp. blaLEN gene for class A BL	ESBL-pool-2.1	cluster_48_fwd	GGTGGAAATGGATCTGGCCA
Klebsiella sp. blaLEN gene for class A BL	ESBL-pool-2.1	cluster_48_rev	ACCATCCACTGCAGGAGTTG
Enterobacteriaceae blaSHV gene for class A BSBL/BL/ESBL	ESBL-pool-2.1	cluster_49_fwd	CCAGATCGGTGACAACGTCA
Enterobacteriaceae blaSHV gene for class A BSBL/BL/ESBL	ESBL-pool-2.1	cluster_49_rev	CCCCGGTTTTATCGGCGATA
Serratia rubidaea blaRUB gene for class A BSBL RUB-1	ESBL-pool-2.1	cluster_53_fwd	GGGATGAACGTGGGGGAATT
Serratia rubidaea blaRUB gene for class A BSBL RUB-1	ESBL-pool-2.1	cluster_53_rev	GCACCGGTTTTGTCAGCAAT
uncultured bacterium blaLRG gene for class A ESBL	ESBL-pool-2.1	cluster_58_fwd	AGCATCTTTTCCCTGTCCCG
uncultured bacterium blaLRG gene for class A ESBL	ESBL-pool-2.1	cluster_58_rev	CGTTTATTCAGCAGTGCGGG
Enterobacteriaceae, Moraxellaceae, ‎Morganellaceae blaCTX-M gene for class A ESBL	ESBL-pool-2.1	cluster_63_fwd	ACCGCCGATAATTCGCAGAT
Enterobacteriaceae, Moraxellaceae, ‎Morganellaceae blaCTX-M gene for class A ESBL	ESBL-pool-2.1	cluster_63_rev	ATTGCCCTTAAGCCACGTCA
S.sonnei and E.coli blaCTX-M gene for class A ESBL	ESBL-pool-2.1	cluster_64_fwd	GCGACAATACCGCCATGAAC
S.sonnei and E.coli blaCTX-M gene for class A ESBL	ESBL-pool-2.1	cluster_64_rev	CAGATTCCCTTCGGCGATGA
Enterobacteriaceae, P.mirabilis, Kluvyera sp., blaCTX-M gene for class A ESBL	ESBL-pool-2.1	cluster_66_fwd	CACGTCAATGGCACGATGAC
Enterobacteriaceae, P.mirabilis, Kluvyera sp., blaCTX-M gene for class A ESBL	ESBL-pool-2.1	cluster_66_rev	TTTATCCCCGACAACCCACG
Klebsiella oxytoca blaOXY gene for class A ESBL OXY-3-1	ESBL-pool-2.1	cluster_70_fwd	ATCGGATCTGGTGGTCTGGA
Klebsiella oxytoca blaOXY gene for class A ESBL OXY-3-1	ESBL-pool-2.1	cluster_70_rev	AGCATGATTTTCCGGCCAGA
Rahnella sp. blaRAHN gene for class A ESBL RAHN-2	ESBL-pool-2.1	cluster_72_fwd	GCTCGGCGATAAAACGTTCC
Rahnella sp. blaRAHN gene for class A ESBL RAHN-2	ESBL-pool-2.1	cluster_72_rev	TCAATAACCCGGCGTCACAA
Citrobacter koseri blaSED gene for class A BL	ESBL-pool-2.1	cluster_73_fwd	ACGAACTGGAATCCGGTGAC
Citrobacter koseri blaSED gene for class A BL	ESBL-pool-2.1	cluster_73_rev	GTAGGTGACGAGGATCAGCG
Chromobacterium piscinae blaCRP gene for carbapenem-hydrolyzing class A BL	ESBL-pool-2.1	cluster_77_fwd	AGCCGCCAATGTCTTGATGA
Chromobacterium piscinae blaCRP gene for carbapenem-hydrolyzing class A BL	ESBL-pool-2.1	cluster_77_rev	GCCGGTAGTGTTCCCTTTGA
Pseudomonas fluorescens blaBIC gene for carbapenem-hydrolyzing class A BL BIC-1	ESBL-pool-2.1	cluster_79_fwd	TTTGACTTTCGAGCGGACGA
Pseudomonas fluorescens blaBIC gene for carbapenem-hydrolyzing class A BL BIC-1	ESBL-pool-2.1	cluster_79_rev	AATTTGTCGCACCGTTGTCG
Pseudomonas luteola blaLUT gene for class A BL	ESBL-pool-2.1	cluster_80_fwd	CGTGACGGAAAAGCACGTTT
Pseudomonas luteola blaLUT gene for class A BL	ESBL-pool-2.1	cluster_80_rev	GTTTATCCGCAGCCAGCATG
uncultured bacterium BLR1 bla gene for class A BL LRA-1	ESBL-pool-2.1	cluster_81_fwd	TCGCCCATCACCGAAAAGAA
uncultured bacterium BLR1 bla gene for class A BL LRA-1	ESBL-pool-2.1	cluster_81_rev	AACCAGGTCTTGAGCTGCTC
Streptomyces sp. blaL gene for class A BL	ESBL-pool-2.1	cluster_82_fwd	TGGAGAAGAAGTTCGACGCC
Streptomyces sp. blaL gene for class A BL	ESBL-pool-2.1	cluster_82_rev	CCGTAGTGGACCACCTTGTC
Actinomadura sp. blaR39 gene for class A BL	ESBL-pool-2.1	cluster_83_fwd	AGGACCTGGTCGACTACTCC
Actinomadura sp. blaR39 gene for class A BL	ESBL-pool-2.1	cluster_83_rev	TGTTGAGGAGCATCTCGGTG
Nocardia asteroides blaAST gene for class A BSBL	ESBL-pool-2.1	cluster_84_fwd	GTTGCTGAAACTGCTCGGTG
Nocardia asteroides blaAST gene for class A BSBL	ESBL-pool-2.1	cluster_84_rev	TCCTGCTCGGACTTAGTCGA
Mycobacterium tuberculosis blaA gene for class A BL	ESBL-pool-2.1	cluster_87_fwd	GCCCAACAACACGTTCAGAC
Mycobacterium tuberculosis blaA gene for class A BL	ESBL-pool-2.1	cluster_87_rev	TTTGCTCGTCCGTAGTCACC
Klebsiella pneumoniae blaBKC gene for carbapenem-hydrolyzing class A BL BKC-1	ESBL-pool-2.1	cluster_90_fwd	GCGTCGACAGGAAGGAAGAA
Klebsiella pneumoniae blaBKC gene for carbapenem-hydrolyzing class A BL BKC-1	ESBL-pool-2.1	cluster_90_rev	TCTCGCGATAGTTGAGCGTC
Sphingobium yanoikuyae blaSGM gene for class A BL	ESBL-pool-2.1	cluster_91_fwd	ATGATCGCTTTGCCATGTGC
Sphingobium yanoikuyae blaSGM gene for class A BL	ESBL-pool-2.1	cluster_91_rev	GCCTTGATCCTTTTGTCGCC
Sphingomonas sp. blaSGM gene for class A ESBL	ESBL-pool-2.1	cluster_95_fwd	TCTCGACAATCTCATGCCCG
Sphingomonas sp. blaSGM gene for class A ESBL	ESBL-pool-2.1	cluster_95_rev	TTCCGCATTTTCGTTGAGCG
Pseudomonas aeruginosa blaPME gene for class A ESBL	ESBL-pool-2.1	cluster_97_fwd	CTCGACATTCAAGCTGCTGC
Pseudomonas aeruginosa blaPME gene for class A ESBL	ESBL-pool-2.1	cluster_97_rev	TTTCAACCATCCATTCGCGC
Enterobacter cloacae blaLAP gene for class A BL	ESBL-pool-2.1	cluster_99_fwd	CGATGAGCGTGATACCACCA
Enterobacter cloacae blaLAP gene for class A BL	ESBL-pool-2.1	cluster_99_rev	CCGAGATCCGTGATCACCTG
Bacillus clausii blaBCL gene for class A BL	ESBL-pool-2.1	cluster_100_fwd	CAACCGGTTTCCAACGAACC
Bacillus clausii blaBCL gene for class A BL	ESBL-pool-2.1	cluster_100_rev	TGCAGCCGTGTTATCGCTAT
Enterobacteriaceae blaPER gene for class A ESBL	ESBL-pool-2.1	cluster_101_fwd	GTGTTCCAGTGCAGCAACTG
Enterobacteriaceae blaPER gene for class A ESBL	ESBL-pool-2.1	cluster_101_rev	GGTGGTTTCGACCATCCACT
Bacteroides uniformis cblA gene for CblA family class A BL	ESBL-pool-2.1	cluster_104_fwd	TTCCCGACCAGGATTTCACG
Bacteroides uniformis cblA gene for CblA family class A BL	ESBL-pool-2.1	cluster_104_rev	CGTCGGGAAGGATAACGAGG
Shewanella algae blaOXA gene for carbapenem-hydrolyzing class D BL	ESBL-pool-2.1	cluster_108_fwd	CAACAATCTAAGTCGCGCCG
Shewanella algae blaOXA gene for carbapenem-hydrolyzing class D BL	ESBL-pool-2.1	cluster_108_rev	TAGCTGCCATCACTTTGGGG
uncultured bacterium blaLRA gene for subclass B3 metallo-BL	ESBL-pool-2.1	cluster_109_fwd	CGGTTCGTATCCGCTGATCA
uncultured bacterium blaLRA gene for subclass B3 metallo-BL	ESBL-pool-2.1	cluster_109_rev	CTTCAGCGTGCTGGCAAAAT
Serratia marcescens blaSMB gene for subclass B3 metallo-BL	ESBL-pool-2.1	cluster_113_fwd	TTGTGGCTGCCAATATCCGT
Serratia marcescens blaSMB gene for subclass B3 metallo-BL	ESBL-pool-2.1	cluster_113_rev	GTTTCACCAGCTCCCCATCA
Pseudomonas aeruginosa blaAIM gene for subclass B3 metallo-BL	ESBL-pool-2.1	cluster_114_fwd	CCACAGATCCTGGCCAACAT
Pseudomonas aeruginosa blaAIM gene for subclass B3 metallo-BL	ESBL-pool-2.1	cluster_114_rev	GGAAGACGTCGTCCGAGATC
uncultured bacterium blaLRA gene for subclass B3 metallo-BL LRA-8	ESBL-pool-2.1	cluster_116_fwd	CTGAAGATCGTGTACGCCGA
uncultured bacterium blaLRA gene for subclass B3 metallo-BL LRA-8	ESBL-pool-2.1	cluster_116_rev	CTTCCGGGTCCTTGATCGAC
Stenotrophomonas maltophilia blaL1 gene for L1 family subclass B3 metallo-BL	ESBL-pool-2.1	cluster_122_fwd	GGTCACCTGCTGGACAACAT
Stenotrophomonas maltophilia blaL1 gene for L1 family subclass B3 metallo-BL	ESBL-pool-2.1	cluster_122_rev	TCATCACCGAAGTGCAGGTC
Stenotrophomonas maltophilia blaL1 gene for L1 family subclass B3 metallo-BL	ESBL-pool-2.1	cluster_125_fwd	CTCGTCCTGATCGATGGTGG
Stenotrophomonas maltophilia blaL1 gene for L1 family subclass B3 metallo-BL	ESBL-pool-2.1	cluster_125_rev	GATCCATGACGATGCGGTCT
Pseudomonas aeruginosa blaGES gene for class A ESBL	ESBL-pool-2.1	cluster_127_fwd	GACCTTCAAGACCGACCTGG
Pseudomonas aeruginosa blaGES gene for class A ESBL	ESBL-pool-2.1	cluster_127_rev	GCTCCACTCCACGATCATGT
Achromobacter xylosoxidans blaOXA gene for class D BL	ESBL-pool-2.1	cluster_130_fwd	GAACTACCAGCCCGCCTATC
Achromobacter xylosoxidans blaOXA gene for class D BL	ESBL-pool-2.1	cluster_130_rev	GAAAGCCAGTTGTTCCAGCG
Burkholderia pseudomallei blaOXA gene for oxacillin-hydrolyzing class D BL	ESBL-pool-2.1	cluster_134_fwd	AGATCGCGATCAGCCTGATG
Burkholderia pseudomallei blaOXA gene for oxacillin-hydrolyzing class D BL	ESBL-pool-2.1	cluster_134_rev	ATTCCAATTGTTCGAGCGGC
Ralstonia mannitolilytica blaOXA gene for class D BL	ESBL-pool-2.1	cluster_136_fwd	CTCGACTACGGCAACATGGA
Ralstonia mannitolilytica blaOXA gene for class D BL	ESBL-pool-2.1	cluster_136_rev	AGCCGACAAACCAGCCATAA
Pseudomonas aeruginosa blaSPM gene for subclass B1 metallo-BL	ESBL-pool-2.1	cluster_139_fwd	ATGCTTGATGGGACCGTTGT
Pseudomonas aeruginosa blaSPM gene for subclass B1 metallo-BL	ESBL-pool-2.1	cluster_139_rev	GAGCCGGTCCTGGAAATGAA
P.aeruginosa, E.cloacae blaGIM gene for subclass B1 metallo-BL	ESBL-pool-2.2	cluster_140_fwd	GTAGCGTTGCCAGCTTTAGC
P.aeruginosa, E.cloacae blaGIM gene for subclass B1 metallo-BL	ESBL-pool-2.2	cluster_140_rev	CGAGGCAGCCACCAAATAGT
Enterobacteriaceae, P.aeruginosa and P.mirabilis blaVIM gene for subclass B1 metallo-BL	ESBL-pool-2.2	cluster_145_fwd	GAAGGACTCTCATCGAGCGG
Enterobacteriaceae, P.aeruginosa and P.mirabilis blaVIM gene for subclass B1 metallo-BL	ESBL-pool-2.2	cluster_145_rev	TGCTTTGACAACGTTCGCTG
Pseudomonas aeruginosa blaVIM gene for subclass B1 metallo-BL	ESBL-pool-2.2	cluster_146_fwd	AACTCGGTGACACGGTGTAC
Pseudomonas aeruginosa blaVIM gene for subclass B1 metallo-BL	ESBL-pool-2.2	cluster_146_rev	GCAACATTACCCGCGGATTC
Klebsiella pneumoniae blaOXA gene for oxacillin-hydrolyzing class D BL	ESBL-pool-2.2	cluster_147_fwd	TTTCCGCCACTCTCCCAATC
Klebsiella pneumoniae blaOXA gene for oxacillin-hydrolyzing class D BL	ESBL-pool-2.2	cluster_147_rev	ATTGCTGCGAGAACCAGACA
Enterobacterales blaACC gene for cephalosporin-hydrolyzing class C BL	ESBL-pool-2.2	cluster_148_fwd	GCTACTTGAAGGTTCCGGCT
Enterobacterales blaACC gene for cephalosporin-hydrolyzing class C BL	ESBL-pool-2.2	cluster_148_rev	CGCCATATCGTTACCGGTGA
uncultured bacterium blaLRA gene for subclass B3 metallo-BL LRA-17	ESBL-pool-2.2	cluster_150_fwd	TATGACCTGGCCTGCTACCT
uncultured bacterium blaLRA gene for subclass B3 metallo-BL LRA-17	ESBL-pool-2.2	cluster_150_rev	TTTGGCGCCTGTCATCTTCT
uncultured bacterium blaLRA gene for subclass B3 metallo-BL LRA-19	ESBL-pool-2.2	cluster_151_fwd	CCACCCTTGTCATGCTCCAT
uncultured bacterium blaLRA gene for subclass B3 metallo-BL LRA-19	ESBL-pool-2.2	cluster_151_rev	GATCACCCACAGCCTTGTCA
Pectobacterium atrosepticum blaCAR gene for subclass B3 metallo-BL	ESBL-pool-2.2	cluster_152_fwd	GCGGTCCATCCTCAGCTATC
Pectobacterium atrosepticum blaCAR gene for subclass B3 metallo-BL	ESBL-pool-2.2	cluster_152_rev	CGCTAGGTTTCCCCAGTGTT
Epilithonimonas sp. blaESP gene for subclass B3 metallo-BL	ESBL-pool-2.2	cluster_157_fwd	TCGCAACCTTACGAGCCATT
Epilithonimonas sp. blaESP gene for subclass B3 metallo-BL	ESBL-pool-2.2	cluster_157_rev	GCGCTTGTGTCAAAGTCAGG
Elizabethkingia meningoseptica blaGOB gene for subclass B3 metallo-BL	ESBL-pool-2.2	cluster_158_fwd	AGCTGGAAAGCACAGGTTGT
Elizabethkingia meningoseptica blaGOB gene for subclass B3 metallo-BL	ESBL-pool-2.2	cluster_158_rev	CGCACCTGTTTCTGTTTGCA
Elizabethkingia miricola blaGOB gene for subclass B3 metallo-BL	ESBL-pool-2.2	cluster_160_fwd	CGGAAACCGGTGCGAAATTT
Elizabethkingia miricola blaGOB gene for subclass B3 metallo-BL	ESBL-pool-2.2	cluster_160_rev	CGAACTGACTTGCATGCGAG
uncultured bacterium blaLRA gene for subclass B3 metallo-BL LRA-12	ESBL-pool-2.2	cluster_163_fwd	AGCCGTTTCCGTTAGCATCA
uncultured bacterium blaLRA gene for subclass B3 metallo-BL LRA-12	ESBL-pool-2.2	cluster_163_rev	CAAACATACTGCCATGCCCG
Fluoribacter gormanii blaFEZ gene for subclass B3 metallo-BL	ESBL-pool-2.2	cluster_164_fwd	TTTCGGTGATCCTGTCTGGC
Fluoribacter gormanii blaFEZ gene for subclass B3 metallo-BL	ESBL-pool-2.2	cluster_164_rev	GCCTGATATTGCTTGCCGTG
Capnocytophaga sputigena blaCSP gene for class A ESBL	ESBL-pool-2.2	cluster_165_fwd	CTTGGAGCCCCATTCGTGAT
Capnocytophaga sputigena blaCSP gene for class A ESBL	ESBL-pool-2.2	cluster_165_rev	AGCCTGTCTGCTCCAGTAGA
Acinetobacter sp. and O.urethralis blaADC gene for class C ESBL/BL	ESBL-pool-2.2	cluster_167_fwd	ATATGGCGTCCCAGCATCAG
Acinetobacter sp. and O.urethralis blaADC gene for class C ESBL/BL	ESBL-pool-2.2	cluster_167_rev	GCTGCCTTAATGCGCTCTTC
Francisella tularensis blaFTU gene for class A BL	ESBL-pool-2.2	cluster_173_fwd	CCTAAGTGATAGTCCTGCCAGT
Francisella tularensis blaFTU gene for class A BL	ESBL-pool-2.2	cluster_173_rev	TGCTGCATATTGACCACAAGT
Clostridium botulinum blaCBP gene for penicillin-hydrolyzing class A BL	ESBL-pool-2.2	cluster_177_fwd	ACCTGCACGTATCGAACCAG
Clostridium botulinum blaCBP gene for penicillin-hydrolyzing class A BL	ESBL-pool-2.2	cluster_177_rev	CAGTCTTTTGGTGCTCCTGC
K.pneumoniae, P.aeruginosa, C.freundii, S.flexneri, P.mirabilis blaOXA gene for oxacillin-hydrolyzing class D BL	ESBL-pool-2.2	cluster_181_fwd	TATCTACAGCAGCGCCAGTG
K.pneumoniae, P.aeruginosa, C.freundii, S.flexneri, P.mirabilis blaOXA gene for oxacillin-hydrolyzing class D BL	ESBL-pool-2.2	cluster_181_rev	TGCATCCACGTCTTTGGTGT
Fluoribacter gormanii blaOXA gene for oxacillin-hydrolyzing class D BL OXA-29	ESBL-pool-2.2	cluster_182_fwd	ATTTCCGGCGACAAAGGTCA
Fluoribacter gormanii blaOXA gene for oxacillin-hydrolyzing class D BL OXA-29	ESBL-pool-2.2	cluster_182_rev	ATCCAGCCGATGAACCATCC
Acinetobacter johnsonii blaOXA gene for carbapenem-hydrolyzing class D BL	ESBL-pool-2.2	cluster_183_fwd	AGCAGATCCAACAGGCCTTC
Acinetobacter johnsonii blaOXA gene for carbapenem-hydrolyzing class D BL	ESBL-pool-2.2	cluster_183_rev	GCAGTGGACCGACTAACCAA
Acinetobacter sp. blaOXA gene for class D BL	ESBL-pool-2.2	cluster_188_fwd	GATCTCAGCCGTGCAGATCA
Acinetobacter sp. blaOXA gene for class D BL	ESBL-pool-2.2	cluster_188_rev	CGCCAGCTCCTGATAGACAG
Acinetobacter sp. blaOXA gene for OXA-286 family class D BL OXA-288	ESBL-pool-2.2	cluster_192_fwd	CTTGATCGTGCAGAACAGCG
Acinetobacter sp. blaOXA gene for OXA-286 family class D BL OXA-288	ESBL-pool-2.2	cluster_192_rev	AGCCCACTCGCTTAACTTCC
Acinetobacter sp. blaOXA gene for class D BL	ESBL-pool-2.2	cluster_193_fwd	TAGCGCTTCTTACACCCTGC
Acinetobacter sp. blaOXA gene for class D BL	ESBL-pool-2.2	cluster_193_rev	TTCCCAGCTGCTGAAAGTCC
Acinetobacter sp. blaOXA gene for class D BL OXA-307	ESBL-pool-2.2	cluster_194_fwd	GCGGGTGGCGAATTTATTCC
Acinetobacter sp. blaOXA gene for class D BL OXA-307	ESBL-pool-2.2	cluster_194_rev	TACAGCCGATGCCTGCATAG
Acinetobacter haemolyticus blaOXA gene for carbapenem-hydrolyzing class D BL	ESBL-pool-2.2	cluster_196_fwd	CGCCTGCCAGCATATCCATA
Acinetobacter haemolyticus blaOXA gene for carbapenem-hydrolyzing class D BL	ESBL-pool-2.2	cluster_196_rev	AGCTTGCATGGCTTCAGCTA
Acinetobacter venetianus blaOXA gene for class D BL OXA-266	ESBL-pool-2.2	cluster_197_fwd	CCTACGCGTTGGCAAATGAG
Acinetobacter venetianus blaOXA gene for class D BL OXA-266	ESBL-pool-2.2	cluster_197_rev	TTCCGAGCCTCCACATGTTC
A.baumannii, A.pitii blaOXA gene for OXA-24 family carbapenem-hydrolyzing class D BL	ESBL-pool-2.2	cluster_199_fwd	ACGGACTGGCCTAGAGCTAA
A.baumannii, A.pitii blaOXA gene for OXA-24 family carbapenem-hydrolyzing class D BL	ESBL-pool-2.2	cluster_199_rev	CCATTAGCTTGCTCCACCCA
A.baumannii, A.nosocomialis blaOXA gene for carbapenem-hydrolyzing class D BL	ESBL-pool-2.2	cluster_206_fwd	TTTTGGCTGGTGGGTCCTTT
A.baumannii, A.nosocomialis blaOXA gene for carbapenem-hydrolyzing class D BL	ESBL-pool-2.2	cluster_206_rev	GAGGCTGAACAACCCATCCA
Acinetobacter sp. blaOXA gene for class D BL OXA-527	ESBL-pool-2.2	cluster_207_fwd	TCGGCCTTGAGCACCATAAG
Acinetobacter sp. blaOXA gene for class D BL OXA-527	ESBL-pool-2.2	cluster_207_rev	CCCTTTAGGTTGGACCACCC
Acinetobacter bereziniae blaOXA gene for carbapenem-hydrolyzing class D BL	ESBL-pool-2.2	cluster_209_fwd	ATGCGGAGATTGGTCAGCAA
Acinetobacter bereziniae blaOXA gene for carbapenem-hydrolyzing class D BL	ESBL-pool-2.2	cluster_209_rev	TCACCTTGCCATTGGGTTGT
Acinetobacter guillouiae blaOXA gene for class D BL	ESBL-pool-2.2	cluster_210_fwd	TTATGCGCAAACTCAAGCCG
Acinetobacter guillouiae blaOXA gene for class D BL	ESBL-pool-2.2	cluster_210_rev	ATACGTCGTGCCAACTCCTG
Acinetobacter bohemicus blaOXA gene for class D BL OXA-296	ESBL-pool-2.2	cluster_211_fwd	GCACACACATCAGCCGTTTT
Acinetobacter bohemicus blaOXA gene for class D BL OXA-296	ESBL-pool-2.2	cluster_211_rev	GCCTATACGTCGAGCAAGCT
Acinetobacter baumannii blaOXA gene for carbapenem-hydrolyzing class D BL	ESBL-pool-2.2	cluster_212_fwd	ATGGCACGCATTTAGACCGA
Acinetobacter baumannii blaOXA gene for carbapenem-hydrolyzing class D BL	ESBL-pool-2.2	cluster_212_rev	ATTCTCCCCTCTGCGCTCTA
Riemerella anatipestifer blaOXA gene for class D BL	ESBL-pool-2.2	cluster_214_fwd	TGGAATGGTGAAAAACGCAAA
Riemerella anatipestifer blaOXA gene for class D BL	ESBL-pool-2.2	cluster_214_rev	TCAACATTCAATCCGTCTGTCG
Campylobacter sp. blaOXA gene for class D BL	ESBL-pool-2.2	cluster_216_fwd	ACAAACGCATTTTACCTGCCT
Campylobacter sp. blaOXA gene for class D BL	ESBL-pool-2.2	cluster_216_rev	GACCCCAACCTGTTTTTGCA
Campylobacter jejuni blaOXA gene for class D BL, OXA-446/447	ESBL-pool-2.2	cluster_218_fwd	AGCCTTTTCTCCTGCTTCAACT
Campylobacter jejuni blaOXA gene for class D BL, OXA-446/447	ESBL-pool-2.2	cluster_218_rev	TCGAGCCAAAAGGTATCGATT
Arcobacter butzleri blaOXA gene for class D BL	ESBL-pool-2.2	cluster_221_fwd	TCGCTTCAAAAATTGGAGTTGA
Arcobacter butzleri blaOXA gene for class D BL	ESBL-pool-2.2	cluster_221_rev	TCCTTCCCAACCTGTTTTTGC
Brachyspira pilosicoli blaOXA gene for oxacillin-hydrolyzing class D BL	ESBL-pool-2.2	cluster_222_fwd	TGGCTTGAAGGACCTTTGGA
Brachyspira pilosicoli blaOXA gene for oxacillin-hydrolyzing class D BL	ESBL-pool-2.2	cluster_222_rev	CCAGCCTACGAACCAACCAA
Bacillus subtilis subsp. inaquosorum blaBSU gene for class D BL	ESBL-pool-2.2	cluster_229_fwd	CAAGGGAAAGGTGCAAGCAC
Bacillus subtilis subsp. inaquosorum blaBSU gene for class D BL	ESBL-pool-2.2	cluster_229_rev	GTCAAGTTCCCGTTTCACGC
Bacillus pumilus blaBPU gene for class D BL	ESBL-pool-2.2	cluster_230_fwd	TGGCACGTGACATTGGAGAA
Bacillus pumilus blaBPU gene for class D BL	ESBL-pool-2.2	cluster_230_rev	CCTACGTACCAGCCGATGTC
Pseudomonas and Enterobacteriaceae blaOXA gene for class D BL/ESBL	ESBL-pool-2.2	cluster_231_fwd	AAGAGTTCTCTGCCGAAGCC
Pseudomonas and Enterobacteriaceae blaOXA gene for class D BL/ESBL	ESBL-pool-2.2	cluster_231_rev	CTCTTGGCTTTCCGTCCCAT
S.enterica, P.aeruginosa blaOXA gene for class D BL	ESBL-pool-2.2	cluster_232_fwd	TTTCAAATGGGACGGCAAGC
S.enterica, P.aeruginosa blaOXA gene for class D BL	ESBL-pool-2.2	cluster_232_rev	TACCCAACCAACCCACCAAG
Vibrio harveyi blaVHH gene for carbenicillin-hydrolyzing class A BL	ESBL-pool-2.2	cluster_240_fwd	TGCCAAAGTAGAAGAGCGCA
Vibrio harveyi blaVHH gene for carbenicillin-hydrolyzing class A BL	ESBL-pool-2.2	cluster_240_rev	CATTGCTGTGATACCGCGTG
Bacillus licheniformis blaP gene for class A BL	ESBL-pool-2.2	cluster_248_fwd	TGGCGGACCTGAAAGTTTGA
Bacillus licheniformis blaP gene for class A BL	ESBL-pool-2.2	cluster_248_rev	ACAGGATCTCCTTTTGGCGG
Bacillus cereus bla gene for Exo family class A BL	ESBL-pool-2.2	cluster_249_fwd	GGCAGCTGTTCGTTCAAGTG
Bacillus cereus bla gene for Exo family class A BL	ESBL-pool-2.2	cluster_249_rev	AGTTGGTATGCCTGCACGAA
Enterobacter cloacae blaIMI gene for carbapenem-hydrolyzing class A BL IMI-8	ESBL-pool-2.2	cluster_252_fwd	CACCCGCAGCTGTAGGTAAA
Enterobacter cloacae blaIMI gene for carbapenem-hydrolyzing class A BL IMI-8	ESBL-pool-2.2	cluster_252_rev	TGGCCAGACAACCGCATAAT
Enterobacter cloacae blaIMI gene for carbapenem-hydrolyzing class A BL IMI-5	ESBL-pool-2.2	cluster_253_fwd	TGCCACTTGGAGAAATGGCT
Enterobacter cloacae blaIMI gene for carbapenem-hydrolyzing class A BL IMI-5	ESBL-pool-2.2	cluster_253_rev	AAGTGGTGCCCTGTCATCTG
Vibrio cholerae blaVCC gene for carbapenem-hydrolyzing class A BL	ESBL-pool-2.2	cluster_254_fwd	TAGGTTGGACCGATGGGAGT
Vibrio cholerae blaVCC gene for carbapenem-hydrolyzing class A BL	ESBL-pool-2.2	cluster_254_rev	ACGCATGATCGTTTGCTGTG
Pseudomonas aeruginosa, Burkholderia cepacia blaOXA gene for oxacillin-hydrolyzing class D BL	ESBL-pool-2.3	cluster_255_fwd	TTATGCGGTCAACGGGAGAC
Pseudomonas aeruginosa, Burkholderia cepacia blaOXA gene for oxacillin-hydrolyzing class D BL	ESBL-pool-2.3	cluster_255_rev	AGGTGCCTGTTTTATCGCCA
Serratia fonticola blaSFC gene for carbapenem-hydrolyzing class A BL	ESBL-pool-2.3	cluster_256_fwd	GGAGGGCGAATTGGGGTTTA
Serratia fonticola blaSFC gene for carbapenem-hydrolyzing class A BL	ESBL-pool-2.3	cluster_256_rev	AGAGTGGCAGCAGACAACTC
Pedobacter sp. blaB1PEDO gene for subclass B1 metallo-BL PEDO-3	ESBL-pool-2.3	cluster_259_fwd	TTTGCCTCTTTCGCGCAAAA
Pedobacter sp. blaB1PEDO gene for subclass B1 metallo-BL PEDO-3	ESBL-pool-2.3	cluster_259_rev	TGGTAAAGGTGTAGGCTGCG
Citrobacter freundii blaKHM gene for subclass B1 metallo-BL	ESBL-pool-2.3	cluster_262_fwd	ATACGCCCATTTCAGCCACA
Citrobacter freundii blaKHM gene for subclass B1 metallo-BL	ESBL-pool-2.3	cluster_262_rev	GTCGCCAACTTTTCCGTGAC
A.pittii, P.aeruginosa blaSIM gene for subclass B1 metallo-BL	ESBL-pool-2.3	cluster_264_fwd	TTCCACGACGACAGTACTGC
A.pittii, P.aeruginosa blaSIM gene for subclass B1 metallo-BL	ESBL-pool-2.3	cluster_264_rev	ATGGCCTGTTCCCATGTGAG
Pseudomonas aeruginosa blaIMP gene for subclass B1 metallo-BL	ESBL-pool-2.3	cluster_272_fwd	TGAGGAAGTTAACGGCTGGG
Pseudomonas aeruginosa blaIMP gene for subclass B1 metallo-BL	ESBL-pool-2.3	cluster_272_rev	GCAGACTTTGGCCAAGCTTC
Elizabethkingia meningoseptica blaCME gene for class A ESBL	ESBL-pool-2.3	cluster_274_fwd	CCAGTTGGTGCTTGCTCAAC
Elizabethkingia meningoseptica blaCME gene for class A ESBL	ESBL-pool-2.3	cluster_274_rev	GTCGCATCCGTTGTTGTCAC
Chryseobacterium indologenes blaCIA gene for class A ESBL	ESBL-pool-2.3	cluster_275_fwd	CTGGCCTGTGCTGTATTGGA
Chryseobacterium indologenes blaCIA gene for class A ESBL	ESBL-pool-2.3	cluster_275_rev	TGCTGAACAACCTGAGGACC
Chryseobacterium gleum blaCGA gene for class A ESBL	ESBL-pool-2.3	cluster_276_fwd	GGAAAATACATGGTCGCCGC
Chryseobacterium gleum blaCGA gene for class A ESBL	ESBL-pool-2.3	cluster_276_rev	CCCGTTTTTCTTGCGACAGG
Myroides odoratimimus blaMUS gene for subclass B1 metallo-BL	ESBL-pool-2.3	cluster_278_fwd	ACCCACTTCCACGAAGATCG
Myroides odoratimimus blaMUS gene for subclass B1 metallo-BL	ESBL-pool-2.3	cluster_278_rev	GTGGTAGCTTCGGCACTCTT
Myroides odoratus blaTUS gene for subclass B1 metallo-BL	ESBL-pool-2.3	cluster_279_fwd	GATCGTTCGGGTGGACTTGA
Myroides odoratus blaTUS gene for subclass B1 metallo-BL	ESBL-pool-2.3	cluster_279_rev	GACCGGATTGATTCCAGGCA
Myroides odoratus blaMOC gene for subclass B1 metallo-BL	ESBL-pool-2.3	cluster_280_fwd	TCGCTCAGGAGGATTGGACT
Myroides odoratus blaMOC gene for subclass B1 metallo-BL	ESBL-pool-2.3	cluster_280_rev	GCTTTGATTGTTGCAGGCCA
Elizabethkingia meningoseptica blaB gene for subclass B1 metallo-BL BlaB-3/12/13	ESBL-pool-2.3	cluster_281_fwd	GGTGACCAGTAAAGGGGTGG
Elizabethkingia meningoseptica blaB gene for subclass B1 metallo-BL BlaB-3/12/13	ESBL-pool-2.3	cluster_281_rev	TCGTGGCCTGCAACAACATA
Elizabethkingia meningoseptica blaB gene for subclass B1 metallo-BL	ESBL-pool-2.3	cluster_283_fwd	TCATGATGATCGTGCCGGAG
Elizabethkingia meningoseptica blaB gene for subclass B1 metallo-BL	ESBL-pool-2.3	cluster_283_rev	GCAACAACGTACTGAGCACC
Chryseobacterium sp., Acinetobacter sp. blaIND gene for subclass B1 metallo-BL	ESBL-pool-2.3	cluster_284_fwd	ACCGTGCAGGAGACTTAAGC
Chryseobacterium sp., Acinetobacter sp. blaIND gene for subclass B1 metallo-BL	ESBL-pool-2.3	cluster_284_rev	GTTCAACATGTCCACCCCCT
Chryseobacterium indologenes blaIND gene for subclass B1 metallo-BL IND-6	ESBL-pool-2.3	cluster_287_fwd	AACTTTCGGAGTGTTCGGGG
Chryseobacterium indologenes blaIND gene for subclass B1 metallo-BL IND-6	ESBL-pool-2.3	cluster_287_rev	GCTTAAATCTCCTGCCCGGT
Chryseobacterium indologenes blaIND gene for subclass B1 metallo-BL IND	ESBL-pool-2.3	cluster_290_fwd	AGCCCATTGATCAATGCCCA
Chryseobacterium indologenes blaIND gene for subclass B1 metallo-BL IND	ESBL-pool-2.3	cluster_290_rev	CGGTTGAGGTTGCTTTTCCG
Chryseobacterium gleum blaIND gene for subclass B1 metallo-BL	ESBL-pool-2.3	cluster_291_fwd	AAACGCCCAGGATACACAGG
Chryseobacterium gleum blaIND gene for subclass B1 metallo-BL	ESBL-pool-2.3	cluster_291_rev	ACAGCCTCCGTCCAGTATCT
16S rRNA V3	ESBL-pool-2.3	Probio_Uni-F	CCTACGGGRSGCAGCAG
16S rRNA V4	ESBL-pool-2.3	Probio_Uni-R	ATTACCGCGGCTGCT
